# Supplementary material for: A circular network of purine metabolism as coregulators of dilated cardiomyopathy
Source: J Transl Med. 2022 Nov 18;20:532. doi: 10.1186/s12967-022-03739-3 (PMC9673417; doi:10.1186/s12967-022-03739-3)
Supplement: Supplementary file 3 — Additional file 3: Table S3. The differential analysis results of metabolism pathway following the gene set variation analysis. [file 12967_2022_3739_MOESM3_ESM.csv]

	logFC	AveExpr	t	P.Value	adj.P.Val	B
KEGG_BETA_ALANINE_METABOLISM	0.358063295	-0.006690771	11.83998683	1.73E-25	3.21E-23	47.2166767
KEGG_RENIN_ANGIOTENSIN_SYSTEM	0.29920681	0.003673406	10.11838519	4.28E-20	3.98E-18	35.0073372
KEGG_VEGF_SIGNALING_PATHWAY	-0.190489571	0.005236975	-9.865019962	2.52E-19	1.56E-17	33.2649614
KEGG_PURINE_METABOLISM	0.06416473	-0.004516602	9.023202221	2.79E-17	6.11E-16	29.9775065
KEGG_CYSTEINE_AND_METHIONINE_METABOLISM	-0.218289186	0.000866656	-9.290273718	3.32E-17	6.14E-16	29.3790653
KEGG_ALANINE_ASPARTATE_AND_GLUTAMATE_METABOLISM	0.204771954	-0.004177713	8.646815201	9.81E-16	3.65E-14	25.1537106
KEGG_SPHINGOLIPID_METABOLISM	-0.21534961	-0.011892396	-8.414946727	4.47E-15	1.39E-13	23.6676199
KEGG_O_GLYCAN_BIOSYNTHESIS	-0.220928592	-0.005281361	-8.029853626	5.30E-14	1.41E-12	21.2465737
KEGG_PATHOGENIC_ESCHERICHIA_COLI_INFECTION	-0.252036967	-0.020728884	-7.703972627	4.10E-13	9.52E-12	19.2469918
KEGG_TRYPTOPHAN_METABOLISM	0.193348178	0.0124065	7.583556648	8.62E-13	1.78E-11	18.5202242
KEGG_VALINE_LEUCINE_AND_ISOLEUCINE_DEGRADATION	0.325809021	0.029079573	7.29369214	5.02E-12	9.34E-11	16.7988832
KEGG_AMYOTROPHIC_LATERAL_SCLEROSIS_ALS	-0.130011942	-0.002087588	-7.21410131	8.09E-12	1.37E-10	16.3334199
KEGG_THYROID_CANCER	0.172789149	-0.008972133	7.110255133	1.50E-11	2.33E-10	15.7309014
KEGG_LIMONENE_AND_PINENE_DEGRADATION	0.311274416	-0.002654565	7.057456804	2.05E-11	2.93E-10	15.4266770
KEGG_HYPERTROPHIC_CARDIOMYOPATHY_HCM	0.145640329	0.011068089	6.991665801	3.02E-11	4.01E-10	15.0496095
KEGG_ECM_RECEPTOR_INTERACTION	0.20762751	-0.003716872	6.892529811	5.38E-11	6.57E-10	14.4857242
KEGG_B_CELL_RECEPTOR_SIGNALING_PATHWAY	-0.193389422	-0.010375876	-6.884092049	5.65E-11	6.57E-10	14.4379710
KEGG_PRIMARY_BILE_ACID_BIOSYNTHESIS	0.231971847	0.025514925	6.86833557	6.20E-11	6.78E-10	14.3488998
KEGG_NITROGEN_METABOLISM	0.169643314	-0.000879895	6.828637865	7.80E-11	8.06E-10	14.1250795
KEGG_NICOTINATE_AND_NICOTINAMIDE_METABOLISM	0.17555032	0.006299058	6.720713712	1.45E-10	1.42E-09	13.5209069
KEGG_PPAR_SIGNALING_PATHWAY	0.161237852	0.011081661	6.711537351	1.53E-10	1.42E-09	13.4698304
KEGG_PROXIMAL_TUBULE_BICARBONATE_RECLAMATION	0.185091855	0.01166016	6.661044618	2.04E-10	1.81E-09	13.1896147
KEGG_BUTANOATE_METABOLISM	0.243941999	0.019200467	6.577114803	3.28E-10	2.77E-09	12.7269774
KEGG_HISTIDINE_METABOLISM	0.152714836	0.000492326	6.553280478	3.75E-10	3.03E-09	12.5963198
KEGG_OLFACTORY_TRANSDUCTION	-0.182847557	0.000737318	-6.19746081	2.68E-09	2.08E-08	10.6847249
KEGG_ARRHYTHMOGENIC_RIGHT_VENTRICULAR_CARDIOMYOPATHY_ARVC	0.124967357	0.010018263	5.908670992	1.26E-08	9.35E-08	9.1889655
KEGG_LYSINE_DEGRADATION	0.195903299	0.004528803	5.787471636	2.36E-08	1.69E-07	8.5767162
KEGG_CIRCADIAN_RHYTHM_MAMMAL	0.193503414	-0.005760283	5.738010401	3.05E-08	2.10E-07	8.3295526
KEGG_BASE_EXCISION_REPAIR	-0.154493611	-0.005343633	-5.709224954	3.54E-08	2.35E-07	8.1864346
KEGG_GRAFT_VERSUS_HOST_DISEASE	0.255462807	-0.022812621	5.597871026	6.25E-08	4.01E-07	7.6378738
KEGG_STEROID_BIOSYNTHESIS	-0.198442774	-0.011022862	-5.58191435	6.77E-08	4.08E-07	7.5599330
KEGG_PROPANOATE_METABOLISM	0.243656777	0.021847596	5.581054122	6.80E-08	4.08E-07	7.5557360
KEGG_ASTHMA	0.226040316	-0.005168808	5.42941465	1.45E-07	8.45E-07	6.8235846
KEGG_ARGININE_AND_PROLINE_METABOLISM	0.123705402	0.003029462	5.411067487	1.59E-07	8.97E-07	6.7360463
KEGG_TGF_BETA_SIGNALING_PATHWAY	0.130180877	-0.00227859	5.372052581	1.93E-07	1.06E-06	6.5506560
KEGG_DILATED_CARDIOMYOPATHY	0.118341599	0.011388389	5.32204089	2.46E-07	1.29E-06	6.3145275
KEGG_REGULATION_OF_AUTOPHAGY	-0.150264509	0.002757861	-5.319778073	2.49E-07	1.29E-06	6.3038841
KEGG_GLYOXYLATE_AND_DICARBOXYLATE_METABOLISM	0.206555244	0.021795068	5.130689086	6.20E-07	3.12E-06	5.4269982
KEGG_MATURITY_ONSET_DIABETES_OF_THE_YOUNG	-0.241562969	0.013482175	-5.115670661	6.66E-07	3.26E-06	5.3584214
KEGG_FATTY_ACID_METABOLISM	0.19147209	0.021245504	5.025362583	1.02E-06	4.86E-06	4.9494225
KEGG_COMPLEMENT_AND_COAGULATION_CASCADES	-0.150057616	0.009515422	-4.985192857	1.23E-06	5.72E-06	4.7693623
KEGG_PEROXISOME	0.177411567	0.013849966	4.954022049	1.42E-06	6.45E-06	4.6304368
KEGG_GALACTOSE_METABOLISM	-0.130227382	-0.007219431	-4.880668723	2.00E-06	8.84E-06	4.3062735
KEGG_ALLOGRAFT_REJECTION	0.216293944	-0.01942962	4.824833988	2.57E-06	1.11E-05	4.0621484
KEGG_ANTIGEN_PROCESSING_AND_PRESENTATION	0.144815099	-0.011155605	4.74344461	3.72E-06	1.56E-05	3.7103842
KEGG_VIRAL_MYOCARDITIS	0.139321771	-0.011150313	4.735880812	3.85E-06	1.56E-05	3.6779416
KEGG_ACUTE_MYELOID_LEUKEMIA	-0.121191448	-0.00277203	-4.735697517	3.85E-06	1.56E-05	3.6771560
KEGG_SMALL_CELL_LUNG_CANCER	0.106948573	-0.005756912	4.725675784	4.03E-06	1.59E-05	3.6342374
KEGG_JAK_STAT_SIGNALING_PATHWAY	-0.08770857	-0.002909017	-4.653286029	5.56E-06	2.15E-05	3.3264417
KEGG_VIBRIO_CHOLERAE_INFECTION	-0.106053433	-0.004848708	-4.635974366	6.00E-06	2.28E-05	3.2534133
KEGG_ETHER_LIPID_METABOLISM	0.113300138	0.003137492	4.581253526	7.63E-06	2.84E-05	3.0240553
KEGG_ONE_CARBON_POOL_BY_FOLATE	0.189719639	0.002551055	4.506558517	1.06E-05	3.85E-05	2.7146268
KEGG_PROTEASOME	-0.195499506	-0.00416027	-4.459865057	1.29E-05	4.62E-05	2.5233512
KEGG_BASAL_TRANSCRIPTION_FACTORS	-0.158574117	-0.011080162	-4.358682629	1.99E-05	6.97E-05	2.1146046
KEGG_RENAL_CELL_CARCINOMA	-0.106440774	0.002212921	-4.353420939	2.03E-05	6.99E-05	2.0935650
KEGG_GLYCINE_SERINE_AND_THREONINE_METABOLISM	0.117763218	0.007039099	4.329158182	2.25E-05	7.60E-05	1.9968248
KEGG_SELENOAMINO_ACID_METABOLISM	-0.144939018	-0.008190055	-4.258822775	3.01E-05	0.000100083	1.7189738
KEGG_TYPE_I_DIABETES_MELLITUS	0.170454734	-0.017094064	4.055491804	6.88E-05	0.000223214	0.9376384
KEGG_CELL_ADHESION_MOLECULES_CAMS	0.10968264	-0.008018564	4.052749912	6.96E-05	0.000223214	0.9273268
KEGG_OOCYTE_MEIOSIS	-0.087546146	-0.000226197	-4.0318941	7.56E-05	0.000238408	0.8490904
KEGG_NATURAL_KILLER_CELL_MEDIATED_CYTOTOXICITY	-0.107166644	-0.008338004	-3.966587399	9.78E-05	0.00030332	0.6063673
KEGG_AXON_GUIDANCE	-0.083184518	-0.001129914	-3.921719832	0.00011657	0.000355442	0.4416061
KEGG_ADIPOCYTOKINE_SIGNALING_PATHWAY	0.07256148	-0.002060653	3.867390174	0.000143805	0.000431414	0.2442874
KEGG_ENDOMETRIAL_CANCER	-0.078997055	0.008821817	-3.800795062	0.000185439	0.000547487	0.0057117
KEGG_INTESTINAL_IMMUNE_NETWORK_FOR_IGA_PRODUCTION	0.141180978	-0.014998659	3.788468953	0.000194302	0.000564691	-0.0380472
KEGG_BIOSYNTHESIS_OF_UNSATURATED_FATTY_ACIDS	0.133389134	-0.004464244	3.734103952	0.000238395	0.000682176	-0.2295540
KEGG_VASOPRESSIN_REGULATED_WATER_REABSORPTION	0.078958321	0.004188498	3.623027964	0.00035947	0.001013051	-0.6132136
KEGG_APOPTOSIS	-0.092260844	-0.006881702	-3.535019915	0.000494317	0.001372284	-0.9098729
KEGG_ERBB_SIGNALING_PATHWAY	-0.070860645	0.002054088	-3.525389183	0.000511663	0.001399549	-0.9419408
KEGG_DRUG_METABOLISM_OTHER_ENZYMES	-0.080002254	0.000134856	-3.507846447	0.000544735	0.001468417	-1.0001522
KEGG_CHRONIC_MYELOID_LEUKEMIA	-0.099257403	-0.007975296	-3.485441879	0.000589892	0.001567427	-1.0741181
KEGG_RIBOFLAVIN_METABOLISM	-0.125110046	-0.013549224	-3.447322615	0.000674873	0.001767977	-1.1989861
KEGG_AMINO_SUGAR_AND_NUCLEOTIDE_SUGAR_METABOLISM	-0.10636132	-0.008915588	-3.413434408	0.000759913	0.001963108	-1.3089569
KEGG_CITRATE_CYCLE_TCA_CYCLE	0.162619741	0.024244739	3.31497853	0.001067224	0.002693602	-1.6228890
KEGG_MISMATCH_REPAIR	0.138246387	-0.000870728	3.313765241	0.001071648	0.002693602	-1.6267058
KEGG_HEDGEHOG_SIGNALING_PATHWAY	-0.096349503	0.011287077	-3.28420543	0.001184856	0.002938442	-1.7193033
KEGG_CALCIUM_SIGNALING_PATHWAY	0.064518981	0.007238731	3.200601464	0.001568081	0.003837671	-1.9771090
KEGG_MAPK_SIGNALING_PATHWAY	-0.052883477	-0.001252473	-3.152499475	0.001837738	0.004439212	-2.1226892
KEGG_REGULATION_OF_ACTIN_CYTOSKELETON	-0.062824958	-0.007044379	-3.137884497	0.001927799	0.00459706	-2.1665218
KEGG_PYRIMIDINE_METABOLISM	0.085571142	-0.001647117	3.045027145	0.002602098	0.006126459	-2.4406473
KEGG_PORPHYRIN_AND_CHLOROPHYLL_METABOLISM	0.115549173	0.013324492	3.003483096	0.002969059	0.006817839	-2.5608361
KEGG_GLIOMA	-0.062612405	0.004669056	-2.980025955	0.003196688	0.007251025	-2.6280258
KEGG_PENTOSE_PHOSPHATE_PATHWAY	-0.094968923	-0.008332854	-2.975179402	0.003245671	0.007273432	-2.6418474
KEGG_SYSTEMIC_LUPUS_ERYTHEMATOSUS	0.114211638	-0.007027661	2.9363208	0.003663996	0.008113134	-2.7519139
KEGG_TOLL_LIKE_RECEPTOR_SIGNALING_PATHWAY	-0.075902822	-0.008228992	-2.884751597	0.004295373	0.009399287	-2.8959122
KEGG_NUCLEOTIDE_EXCISION_REPAIR	0.117696702	0.001798084	2.816764695	0.005279402	0.011313204	-3.0821303
KEGG_OTHER_GLYCAN_DEGRADATION	0.114354657	-0.001081949	2.815993149	0.00529166	0.011313204	-3.0842199
KEGG_CARDIAC_MUSCLE_CONTRACTION	0.094548045	0.018715346	2.807053312	0.005435592	0.011488864	-3.1083926
KEGG_FOLATE_BIOSYNTHESIS	-0.106586261	0.003385119	-2.799930128	0.005552812	0.011604753	-3.1276019
KEGG_TAURINE_AND_HYPOTAURINE_METABOLISM	-0.094991296	0.002038328	-2.693511554	0.007599608	0.015705857	-3.4091513
KEGG_FC_GAMMA_R_MEDIATED_PHAGOCYTOSIS	-0.080756699	-0.008391304	-2.682705475	0.00784157	0.016027825	-3.4371695
KEGG_GLYCOSPHINGOLIPID_BIOSYNTHESIS_GLOBO_SERIES	-0.08964576	-0.010090911	-2.672530306	0.008075734	0.016327027	-3.4634552
KEGG_PARKINSONS_DISEASE	0.10624126	0.018446451	2.6376609	0.008926745	0.01785349	-3.5528228
KEGG_NEUROTROPHIN_SIGNALING_PATHWAY	-0.058607174	-0.004380912	-2.567720714	0.010880611	0.02152972	-3.7287450
KEGG_PRIMARY_IMMUNODEFICIENCY	0.093702103	-0.01348965	2.540531675	0.011738059	0.022981885	-3.7959312
KEGG_VASCULAR_SMOOTH_MUSCLE_CONTRACTION	0.050635809	0.003079697	2.523315568	0.012311715	0.023853948	-3.8381243
KEGG_STEROID_HORMONE_BIOSYNTHESIS	-0.066004385	0.013165077	-2.515780118	0.012570575	0.024104401	-3.8565069
KEGG_PROSTATE_CANCER	-0.055037675	-0.000949952	-2.498509263	0.013182249	0.025019371	-3.8984427
KEGG_GLYCOLYSIS_GLUCONEOGENESIS	-0.066845667	0.006882032	-2.489644593	0.01350638	0.025375623	-3.9198611
KEGG_RETINOL_METABOLISM	-0.065329965	0.005701063	-2.398962243	0.017251714	0.032088188	-4.1348184
KEGG_GLYCOSAMINOGLYCAN_BIOSYNTHESIS_HEPARAN_SULFATE	-0.060530398	0.000387833	-2.386118471	0.017850392	0.032872999	-4.1646518
KEGG_WNT_SIGNALING_PATHWAY	0.036680885	0.003827963	2.375302872	0.018368668	0.033495806	-4.1896561
KEGG_DORSO_VENTRAL_AXIS_FORMATION	-0.0783174	-0.001628447	-2.351506674	0.019555873	0.03531449	-4.2442894
KEGG_NOTCH_SIGNALING_PATHWAY	0.065709548	-0.006180046	2.296647394	0.022553035	0.040335236	-4.3682432
KEGG_AMINOACYL_TRNA_BIOSYNTHESIS	0.111823501	-0.000883141	2.267938853	0.024276166	0.042878285	-4.4319971
KEGG_FC_EPSILON_RI_SIGNALING_PATHWAY	-0.04948097	0.000787041	-2.265366783	0.024436012	0.042878285	-4.4376716
KEGG_T_CELL_RECEPTOR_SIGNALING_PATHWAY	-0.054837143	-0.004797296	-2.255061415	0.0250857	0.043606918	-4.4603455
KEGG_ARACHIDONIC_ACID_METABOLISM	-0.060630238	0.006932534	-2.228337198	0.026841079	0.046226303	-4.5186839
KEGG_DRUG_METABOLISM_CYTOCHROME_P450	0.0725929	0.01296493	2.221361176	0.027316511	0.046613495	-4.5338028
KEGG_NON_HOMOLOGOUS_END_JOINING	-0.104198634	-0.014209309	-2.200579401	0.028776437	0.048658339	-4.5785738
KEGG_LYSOSOME	-0.062334859	-0.001493368	-2.162411983	0.031634399	0.053008992	-4.6597489
KEGG_INSULIN_SIGNALING_PATHWAY	-0.037307975	0.003776842	-2.157767099	0.031998397	0.053140196	-4.6695348
KEGG_ASCORBATE_AND_ALDARATE_METABOLISM	0.079451504	0.005639464	2.129867476	0.034261688	0.0561513	-4.7278889
KEGG_GLYCOSPHINGOLIPID_BIOSYNTHESIS_LACTO_AND_NEOLACTO_SERIES	-0.058393874	0.003592249	-2.128031841	0.034415313	0.0561513	-4.7317027
KEGG_LONG_TERM_POTENTIATION	-0.041216362	0.004422249	-2.082083276	0.038458366	0.062202227	-4.8261377
KEGG_DNA_REPLICATION	0.086806756	0.002226696	2.001089047	0.046576684	0.074683303	-4.9877657
KEGG_RIBOSOME	-0.104540992	-0.026794764	-1.978737133	0.049057642	0.077989072	-5.0312811
KEGG_GLYCEROLIPID_METABOLISM	0.035065128	0.004245453	1.968511478	0.050229341	0.079175063	-5.0510313
KEGG_TYPE_II_DIABETES_MELLITUS	-0.04477059	0.001523327	-1.940568972	0.053552113	0.083703303	-5.1044962
KEGG_NEUROACTIVE_LIGAND_RECEPTOR_INTERACTION	-0.059269967	0.010121097	-1.917941981	0.05637644	0.087383483	-5.1472488
KEGG_COLORECTAL_CANCER	0.046791009	0.001544663	1.904869919	0.058064268	0.089255817	-5.1717267
KEGG_TIGHT_JUNCTION	-0.026515332	-0.00047399	-1.795171466	0.073960036	0.112758743	-5.3707429
KEGG_CYTOKINE_CYTOKINE_RECEPTOR_INTERACTION	-0.044440916	-0.004689506	-1.694507492	0.091543866	0.137530836	-5.5432722
KEGG_ALDOSTERONE_REGULATED_SODIUM_REABSORPTION	-0.04150462	0.005157657	-1.693754121	0.091687224	0.137530836	-5.5445269
KEGG_EPITHELIAL_CELL_SIGNALING_IN_HELICOBACTER_PYLORI_INFECTION	0.042414139	-0.012120321	1.657693506	0.098764224	0.146961166	-5.6039458
KEGG_GLYCOSAMINOGLYCAN_BIOSYNTHESIS_KERATAN_SULFATE	-0.059616409	-0.000360308	-1.646098949	0.10113078	0.149288294	-5.6227857
KEGG_ABC_TRANSPORTERS	-0.040424303	0.007924801	-1.631047878	0.104270429	0.152361772	-5.6470495
KEGG_NOD_LIKE_RECEPTOR_SIGNALING_PATHWAY	-0.048689508	-0.016283352	-1.628304009	0.104851112	0.152361772	-5.6514495
KEGG_STARCH_AND_SUCROSE_METABOLISM	0.042948794	0.006166322	1.623935598	0.105780925	0.152521333	-5.6584395
KEGG_MELANOMA	-0.029780465	0.001586749	-1.612434369	0.108260456	0.154895729	-5.6767552
KEGG_ALPHA_LINOLENIC_ACID_METABOLISM	0.054081189	0.010728701	1.596552524	0.111760263	0.158682511	-5.7018380
KEGG_AUTOIMMUNE_THYROID_DISEASE	0.058897836	-0.008133831	1.574054246	0.116871212	0.164682163	-5.7369548
KEGG_LEISHMANIA_INFECTION	0.055143623	-0.015392385	1.502719948	0.134304754	0.187824693	-5.8450724
KEGG_PANTOTHENATE_AND_COA_BIOSYNTHESIS	0.047073716	-0.002964205	1.468553519	0.143341889	0.197586605	-5.8951163
KEGG_P53_SIGNALING_PATHWAY	-0.034512171	-0.003397223	-1.468303783	0.143409632	0.197586605	-5.8954780
KEGG_HOMOLOGOUS_RECOMBINATION	-0.044397246	-0.00599369	-1.455966646	0.146787086	0.200752926	-5.9132679
KEGG_GNRH_SIGNALING_PATHWAY	-0.025469355	-0.000646865	-1.372194737	0.171360772	0.232650392	-6.0301660
KEGG_PHOSPHATIDYLINOSITOL_SIGNALING_SYSTEM	0.037582154	-0.001081847	1.341905958	0.180970688	0.243917015	-6.0707559
KEGG_SULFUR_METABOLISM	-0.044127445	-0.003987735	-1.327037831	0.185832884	0.248668463	-6.0903544
KEGG_GLYCOSAMINOGLYCAN_DEGRADATION	-0.041140216	0.001056567	-1.303579538	0.193700924	0.257345513	-6.1208390
KEGG_GLYCOSAMINOGLYCAN_BIOSYNTHESIS_CHONDROITIN_SULFATE	-0.045743928	-0.00960334	-1.299284632	0.195167745	0.257455323	-6.1263623
KEGG_MELANOGENESIS	-0.02661839	0.005059451	-1.282334776	0.201036611	0.263329645	-6.1479848
KEGG_LEUKOCYTE_TRANSENDOTHELIAL_MIGRATION	-0.031242429	-0.010568974	-1.275232604	0.203533893	0.264736392	-6.1569617
KEGG_RNA_POLYMERASE	0.046172543	-0.012438954	1.216610619	0.225019138	0.29064972	-6.2291798
KEGG_SPLICEOSOME	0.056938515	-0.010168033	1.199706034	0.231507442	0.296968167	-6.2493822
KEGG_TERPENOID_BACKBONE_BIOSYNTHESIS	0.055794766	-0.016400301	1.19450517	0.233530281	0.29751118	-6.2555416
KEGG_LINOLEIC_ACID_METABOLISM	-0.037805847	0.010390266	-1.159580182	0.247441184	0.313088845	-6.2962183
KEGG_HUNTINGTONS_DISEASE	0.033088172	0.006314721	1.140220893	0.255399026	0.320974452	-6.3182520
KEGG_ALZHEIMERS_DISEASE	0.032953066	0.00991608	1.10738903	0.269300859	0.336174227	-6.3547811
KEGG_PHENYLALANINE_METABOLISM	0.03348213	0.003825399	0.996380202	0.320129126	0.396537392	-6.4704654
KEGG_PRION_DISEASES	-0.022620177	0.000474689	-0.992691291	0.321920141	0.396537392	-6.4741020
KEGG_PROGESTERONE_MEDIATED_OOCYTE_MATURATION	-0.020807995	-0.001109223	-0.951037526	0.342599445	0.419233532	-6.5142372
KEGG_RNA_DEGRADATION	-0.035637844	-0.006991171	-0.927988839	0.354401586	0.430841144	-6.5357123
KEGG_PATHWAYS_IN_CANCER	0.013410629	-0.004629474	0.824949878	0.410268344	0.495518909	-6.6253188
KEGG_BASAL_CELL_CARCINOMA	-0.022992784	0.00708149	-0.79551958	0.427144541	0.509320309	-6.6489904
KEGG_PANCREATIC_CANCER	-0.020355276	-0.000827152	-0.793119238	0.428538699	0.509320309	-6.6508833
KEGG_GLUTATHIONE_METABOLISM	0.019936664	0.010284846	0.790762444	0.429910154	0.509320309	-6.6527364
KEGG_FRUCTOSE_AND_MANNOSE_METABOLISM	-0.021300864	-0.005736172	-0.780662587	0.435816401	0.513049687	-6.6606155
KEGG_HEMATOPOIETIC_CELL_LINEAGE	0.024867307	-0.001881143	0.758660848	0.448844501	0.525063378	-6.6774307
KEGG_FOCAL_ADHESION	0.018287152	-0.003829212	0.744691093	0.457230747	0.531173395	-6.6878591
KEGG_TASTE_TRANSDUCTION	-0.023302674	0.004986683	-0.740474837	0.459779121	0.531173395	-6.6909686
KEGG_TYROSINE_METABOLISM	0.018753536	0.002931275	0.71485598	0.475434477	0.545869214	-6.7094851
KEGG_VALINE_LEUCINE_AND_ISOLEUCINE_BIOSYNTHESIS	-0.034358151	0.011169079	-0.680315467	0.496999803	0.56712861	-6.7334224
KEGG_MTOR_SIGNALING_PATHWAY	-0.016697186	0.008641433	-0.671841325	0.502369671	0.569760724	-6.7391149
KEGG_GLYCOSYLPHOSPHATIDYLINOSITOL_GPI_ANCHOR_BIOSYNTHESIS	0.02355893	0.006308412	0.638833304	0.523577103	0.590214189	-6.7606102
KEGG_N_GLYCAN_BIOSYNTHESIS	-0.021746248	-0.006726119	-0.625078002	0.532549338	0.596711909	-6.7692494
KEGG_LONG_TERM_DEPRESSION	-0.009894452	-0.000385578	-0.559694766	0.576240935	0.640346419	-6.8077513
KEGG_ADHERENS_JUNCTION	-0.016153036	-0.006639629	-0.556560525	0.578377411	0.640346419	-6.8094905
KEGG_ENDOCYTOSIS	-0.011120523	-0.004834825	-0.528670569	0.597551854	0.65766062	-6.8245378
KEGG_INOSITOL_PHOSPHATE_METABOLISM	-0.015640519	-0.000126558	-0.484857163	0.628246433	0.687375509	-6.8466182
KEGG_CHEMOKINE_SIGNALING_PATHWAY	0.009290565	-0.009226655	0.395661746	0.692727146	0.753492685	-6.8856809
KEGG_CELL_CYCLE	-0.010380172	-0.009058443	-0.381920508	0.702878544	0.760089588	-6.8909964
KEGG_RIG_I_LIKE_RECEPTOR_SIGNALING_PATHWAY	-0.008324202	-0.01314595	-0.357777472	0.720843158	0.775010563	-6.8998811
KEGG_GLYCOSPHINGOLIPID_BIOSYNTHESIS_GANGLIO_SERIES	0.009995879	0.001598867	0.305484085	0.76027816	0.812711136	-6.9171386
KEGG_GLYCEROPHOSPHOLIPID_METABOLISM	-0.005540372	0.005797354	-0.296144557	0.767391141	0.815627156	-6.9199346
KEGG_PYRUVATE_METABOLISM	-0.010273325	0.01866988	-0.260830751	0.794460112	0.839599891	-6.9297225
KEGG_PROTEIN_EXPORT	0.011164691	-0.016018416	0.226619746	0.820923907	0.8626658	-6.9380218
KEGG_NON_SMALL_CELL_LUNG_CANCER	-0.004086744	0.004955337	-0.199177176	0.842302907	0.880159218	-6.9438374
KEGG_CYTOSOLIC_DNA_SENSING_PATHWAY	-0.004984421	-0.010887707	-0.187713911	0.851269045	0.884451579	-6.9460449
KEGG_OXIDATIVE_PHOSPHORYLATION	0.007447354	0.015464611	0.176765296	0.859850769	0.884451579	-6.9480311
KEGG_GAP_JUNCTION	-0.003366836	-0.001713539	-0.175713605	0.860675999	0.884451579	-6.9482156
KEGG_METABOLISM_OF_XENOBIOTICS_BY_CYTOCHROME_P450	-0.003646304	0.008277517	-0.119332993	0.905117361	0.921285547	-6.9564957
KEGG_UBIQUITIN_MEDIATED_PROTEOLYSIS	0.003527176	0.001551583	0.117679294	0.906426103	0.921285547	-6.9566908
KEGG_PENTOSE_AND_GLUCURONATE_INTERCONVERSIONS	0.003341147	0.001807177	0.097948574	0.922059786	0.932082175	-6.9588086
KEGG_SNARE_INTERACTIONS_IN_VESICULAR_TRANSPORT	0.00128465	-0.010401517	0.039793595	0.968292749	0.973526764	-6.9627962
KEGG_BLADDER_CANCER	0.000303629	-0.002757759	0.012400679	0.990116863	0.990116863	-6.9635079
